# Supplementary material for: A Controlled Trial of the Knowledge Impact of Tuberculosis Information Leaflets among Staff Supporting Substance Misusers: Pilot Study
Source: PubMed Central journal article supplement (PMC3117836; doi:10.1371/journal.pone.0020875), 2011-06-17
Supplement: pone.0020875.s003.pdf [file pone.0020875.s003.pdf]

# PART 1 Evaluation of information resource

## ***TB & substance misuse: Guidance for substance misuse – key workers***

---

*Kindly answer the questions below BEFORE reading the leaflet.*

---

**1. Please indicate whether your answers are based on leaflet for :**

Substance misuse & TB: Key worker  Other

**2. Have you read any leaflet on TB before?**

Yes  No  If yes – where

**3. Have you attended any TB awareness / events on TB?**

Yes  No  Not sure

**4. Has anyone in your care known anyone, to have had TB?**

Yes  No  If yes – how many approximately per year

**5. How do you rate your knowledge of TB?**

Very good  Good  Average  Below average  Poor

---

***Please note that the following is not a test. The answers will help us  
improve these resources for your benefit. All responses will be anonymous.  
(Kindly tick as many boxes as you think is appropriate)***

---

**6. Which form of TB is infectious?**

Liver  Lung  Lymph Node  Spine  Brain

**7. Do you think TB is curable?**

Don't know  Yes  No

**8. How long does TB treatment need to be given?**

Don't know  6 – 9 days  6 – 9 weeks  6-9 months  6 – 9 years

**9. What are the symptoms of TB affecting the lungs?**

- Itchiness
- Persistent high temperature
- Unexpected bone fractures
- Heavy sweating at night
- General & unusual sense of tiredness
- Stomach cramping or bloating
- Loss of weight
- Cough – for a long time (2 -3 weeks or more)
- Coughing up blood

**10. What would you do if you suspected a client in your care has TB?**

- Do nothing
- Refer to their GP or a Specialist healthcare team (if they exist)

**11. What would you do if you suspected a client in your care is diagnosed with TB?**

- Client / relative will be given tablets, and will be responsible for taking them
- You or member of your staff will be asked to watch the clients take their tablets
- Your client's progress will be monitored more closely
- TB treatment will not interfere with any other medication they may be on
- My colleagues will be at higher risk of getting infected
- The client should not share house hold items such as bed linen, crockery and utensils
- Pay for their medication

**12. How can you help the medical services?**

- Transfer the client to another hostel
- Provide information about the client's background
- Support DOT
- Contact the Public Health lab

Your professional background / organization:

**Thank you for your co-operation, your participation is greatly appreciated and your efforts will help us improve the information resources we develop for you**

**Consent:** I agree to take part in the above study and I understand that any information I provide will not be shared on an identifiable form and my participation is voluntary.
